# Supplementary material for: Charge-transfer-activated SERS detection of methylene blue using an ultrastable, reliable, and highly sensitive semiconductor Fe3O4@C@TiO2 nano-platform
Source: Royal Society of Chemistry journal article supplement (doi:10.1039/d6ra00307a), 2026-04-22
Supplement: d6ra00307a1.pdf [file d6ra00307a1.pdf]

Supporting Information for

**Charge-Transfer-Activated SERS Detection of Methylene Blue  
Using an Ultrastable, Reliable, and Highly Sensitive  
Semiconductor Fe<sub>3</sub>O<sub>4</sub>@C@TiO<sub>2</sub> Nano-Platform**

Quan-Doan Mai<sup>a,\*</sup>,<sup>1</sup>, Dang Thi Hang Trang<sup>a,1</sup>, Ngo Thi Loan<sup>a</sup>, Ong Van Hoang<sup>b,a</sup>,  
Ta Ngoc Bach<sup>c</sup>, Nguyen Quang Hoa<sup>d</sup>, Nhu Hoa Thi Tran<sup>e,f</sup>, Anh-Tuan Pham<sup>g,a</sup>, Anh-Tuan Le<sup>a,\*\*</sup>

<sup>a</sup>*Phenikaa University Nano Institute (PHENA), Phenikaa School of Engineering (PSE), Phenikaa  
University, Hanoi 12116, Vietnam*

<sup>b</sup>*University of Transport Technology, Trieu Khuc, Thanh Xuan District, Hanoi, Viet Nam*

<sup>c</sup>*Institute of Materials Science (IMS), Vietnam Academy of Science and Technology,  
18 Hoang Quoc Viet, Hanoi 10000, Vietnam*

<sup>d</sup>*Faculty of Physics, VNU University of Science, Vietnam National University, Hanoi,  
Thanh Xuan, Hanoi, Vietnam*

<sup>e</sup>*Faculty of Materials Science and Technology, University of Science, Ho Chi Minh City,  
Vietnam*

<sup>f</sup>*Vietnam National University, Ho Chi Minh City, Vietnam*

<sup>g</sup>*Faculty of Biotechnology, Chemical and Environmental Engineering (BCEE), Phenikaa School  
of Engineering (PSE), Phenikaa University, Hanoi 12116, Vietnam*

Corresponding authors:

\*[doan.maiquan@phenikaa-uni.edu.vn](mailto:doan.maiquan@phenikaa-uni.edu.vn) (Q.D. Mai)

\*\*[tuan.leanh@phenikaa-uni.edu.vn](mailto:tuan.leanh@phenikaa-uni.edu.vn) (A.T. Le)

<sup>1</sup> Q.D. Mai and D.T.H. Trang contributed equally to this work

### Calculation of limit of detection (LOD)

The calibration curve for the linear detection range was obtained as follows:

$$Y = A + B \times \text{Log}(X) \quad (1)$$

where A and B represent the intercept and slope of the regression equation derived from the logarithmic plot of SERS intensity (Y) versus analyte concentration (X).

The LOD is calculated using the following equation(1):

$$LOD = 10^{[(Y_{blank} + 3SD)/Y_{blank} - A]/B} \quad (2)$$

where  $Y_{blank}$  and SD denote the SERS signal and the standard deviation of the blank sample, respectively.

The standard deviation (SD) was determined using the well-known expression:

$$SD = \sqrt{\frac{1}{n-1} \times \sum_i^n (x_i - x_{average})^2} \quad (3)$$

where  $x_i$  is the value obtained from the i-th measurement, and  $x_{average}$  represents the average signal of the blank sample acquired over n replicate measurements.

### Calculation of enhancement factor (EF)

The EF value was determined using a well-established equation that has been widely adopted in previous studies(2, 3):

$$EF = \frac{I_{SERS}}{I_{Raman}} \times \frac{N_{bulk}}{N_{surface}} \quad (4)$$

where  $I_{SERS}$  and  $I_{Raman}$  denote the Raman intensities of the analyte measured with and without the SERS substrate, respectively.  $N_{bulk}$  represents the number of analyte molecules sampled in the conventional Raman measurement, whereas  $N_{surface}$  corresponds to the number of molecules probed under SERS conditions.

$N_{bulk}$  can be calculated following:

$$N_{bulk} = \frac{A_{laser} \times h \times \rho}{M} \times N_A$$

(5)

where  $A_{laser}$ ,  $h$ ,  $\rho$  and  $m$  represent the laser spot area, focal length, density of the solid analyte, and its molecular weight, respectively; and  $N_A$  is Avogadro's number.

$N_{surface}$  can be expressed as:

$$N_{surface} = \frac{C \times V}{A_{substrate}} \times N_A \times A_{laser} \quad (6)$$

where  $C$ ,  $V$ ,  $A_{substrate}$  denote the analyte concentration, the drop-casted volume, and the substrate area, respectively;  $N_A$  is the Avogadro's number; and  $A_{laser}$  is the laser spot area.

Thus EF can be calculated as:

$$EF = \frac{I_{SERS}}{I_{Raman}} \times \frac{N_{bulk}}{N_{surface}} = \frac{h \times \rho \times A_{substrate}}{M \times C \times V} \quad (7)$$

In our case,  $I_{Raman}$  is Raman signal intensity without SERS substrate of methylene blue (MB),  $h = 2 \mu\text{m}$ ,  $\rho_{MB} = 1.757 \text{ g/cm}^3$ ,  $M_{MB} = 320 \text{ g/mol}$ ,  $A_{substrate} = 4 \text{ mm}^2$ ,  $V = 5 \mu\text{L}$ .

### Calculation of relative standard deviation (RSD)

The RSD values for repeatability and reproducibility were determined using the standard formula:

$$\text{RSD} = \frac{SD \times 100}{x_{average}} \quad (8)$$

where SD, determined from Eq. (3), represents the standard deviation, while  $x_{average}$  is the average SERS intensity derived from the repeated measurements.

## References

1. Chen R, Shi H, Meng X, Su Y, Wang H, He Y. Dual-amplification strategy-based SERS chip for sensitive and reproducible detection of DNA methyltransferase activity in human serum. *Analytical chemistry*. 2019;91(5):3597-603.
2. Le Ru EC, Blackie E, Meyer M, Etchegoin PG. Surface enhanced Raman scattering enhancement factors: a comprehensive study. *The Journal of Physical Chemistry C*. 2007;111(37):13794-803.
3. Fu WL, Zhen SJ, Huang CZ. One-pot green synthesis of graphene oxide/gold nanocomposites as SERS substrates for malachite green detection. *Analyst*. 2013;138(10):3075-81.
